# Supplementary material
Source: PubMed Central journal article supplement (PMC11152985)
Supplement: NIHMS1992407-supplement-1.pdf [file NIHMS1992407-supplement-1.pdf]

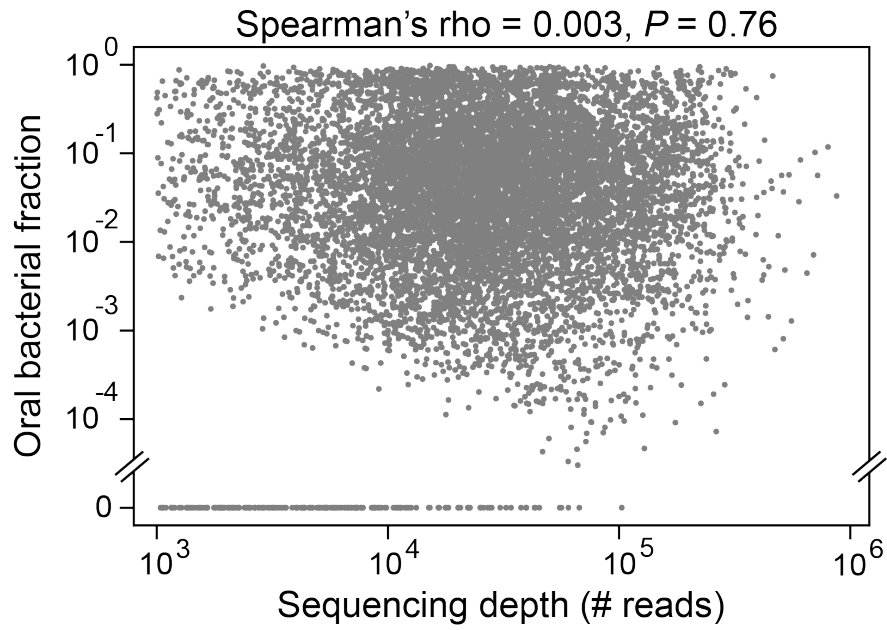

9

10 **Figure S1: No association between oral bacterial fraction and sequencing depth across fecal**  
11 **samples of MSKCC allo-HCT recipients.** Each dot represents a fecal sample ( $n = 10,433$ ). The  
12 statistical test used was Spearman's correlation.

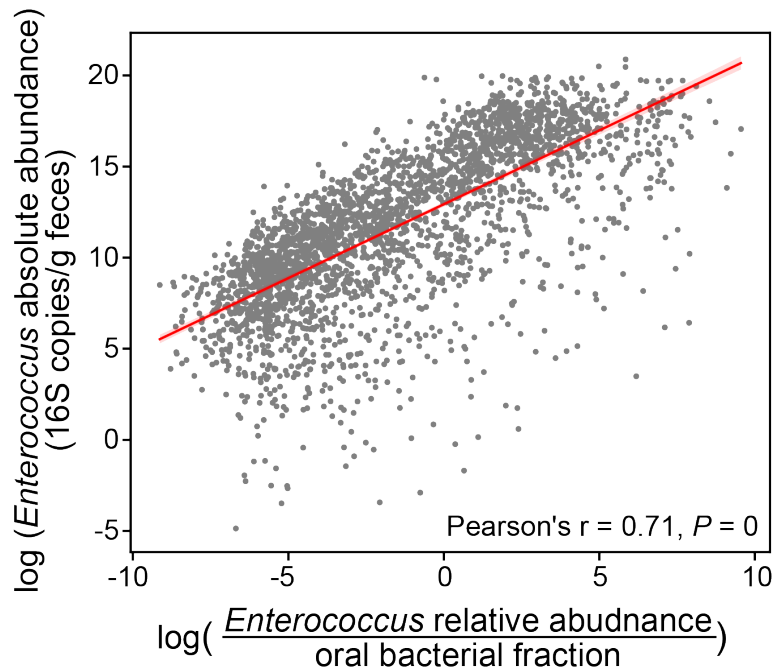

13

14 **Figure S2: Estimating *Enterococcus* absolute abundance through the *Enterococcus*-to-oral**  
 15 **bacteria relative abundance ratio.** Each data point represents a fecal sample from MSKCC  
 16 allo-HCT recipients. We excluded samples with zero relative abundance of *Enterococcus* or zero  
 17 oral bacterial fraction from both the plot and the Pearson's correlation analysis, resulting in a  
 18 subset of 2,765 samples. The red line represents the best linear fit, with the shading in the same  
 19 color indicating its  $\pm 95\%$  confidence interval. The absolute abundance of *Enterococcus* on the y-  
 20 axis was calculated by multiplying its relative abundance by the total bacterial load. The  
 21 statistical test used was Pearson's correlation.

22 **Table S1: Oral bacterial ASV, taxonomy, and total abundance in mouse feces.** **a**, Sequence  
23 and taxonomy of all 53 oral bacterial ASVs found in mouse feces, with specific oral ASVs for  
24 each mouse indicated in the table. **b**, Total relative and absolute abundances of oral and gut  
25 bacteria in fecal samples. We determined the oral or gut bacterial load (absolute abundance) by  
26 multiplying the total bacterial load by the respective oral or gut bacterial fraction (relative  
27 abundance). Bacterial load units for fecal and oral samples are 16S copies per gram of feces and  
28 per swab, respectively. Samples with fewer than 1,000 reads were excluded from analysis and  
29 are labelled in the “Exclusion” column. DSS: Dextran Sulfate Sodium. **c**, FEAST-estimated oral  
30 bacterial fractions in post-treatment fecal samples. FEAST was run ten times for each fecal  
31 sample.

32  
33 See separate Excel table

34 **Table S2: Pairwise Adonis test of compositional similarity between pre- and post-treatment**  
35 **fecal and oral microbiome samples.** Adonis test is a two-sided permutation-based multivariate  
36 analysis that assesses the differences in community composition between groups of microbiome  
37 samples. In our analysis, microbiome samples were divided into four groups: pre-treatment oral  
38 samples (group label: PreOral), pre-treatment fecal samples (group label: PreFecal), post-  
39 treatment oral samples (group label: PostOral), and post-treatment fecal samples (group label:  
40 PostFecal). The table below displays the  $R^2$  values and FDR-corrected  $P$  values for all six pairs  
41 of comparisons and for each mouse group. Bray-Curtis distance metric was used to measure the  
42 similarity between microbiome samples. Notably, post-antibiotic-treatment fecal samples  
43 exhibited greater similarity to pre-treatment oral samples ( $R^2 = 0.15$ ,  $P = 0.055$ ) than to pre-  
44 treatment fecal samples ( $R^2 = 0.20$ ,  $P = 0.032$ ).  
45

| Mouse group                      | Sample group 1   | Sample group 2     | $R^2$ | $P$ value |
|----------------------------------|------------------|--------------------|-------|-----------|
| No treatment                     | PreOral (n = 4)  | PostOral (n = 9)   | 0.21  | 0.058     |
|                                  | PostOral (n = 9) | PostFecal (n = 10) | 0.76  | 0.001     |
|                                  | PreFecal (n = 4) | PostOral (n = 9)   | 0.71  | 0.003     |
|                                  | PreOral (n = 4)  | PostFecal (n = 10) | 0.92  | 0.003     |
|                                  | PreOral (n = 4)  | PreFecal (n = 4)   | 0.95  | 0.044     |
|                                  | PreFecal (n = 4) | PostFecal (n = 10) | 0.09  | 0.305     |
| Antibiotic treatment             | PreOral (n = 8)  | PostOral (n = 8)   | 0.14  | 0.066     |
|                                  | PostOral (n = 8) | PostFecal (n = 12) | 0.12  | 0.066     |
|                                  | PreFecal (n = 7) | PostOral (n = 8)   | 0.42  | 0.002     |
|                                  | PreOral (n = 8)  | PostFecal (n = 12) | 0.15  | 0.055     |
|                                  | PreOral (n = 8)  | PreFecal (n = 7)   | 0.33  | 0.004     |
|                                  | PreFecal (n = 7) | PostFecal (n = 12) | 0.20  | 0.032     |
| Dextran sulfate sodium treatment | PreOral (n = 3)  | PostOral (n = 5)   | 0.41  | 0.086     |
|                                  | PostOral (n = 5) | PostFecal (n = 9)  | 0.10  | 0.273     |
|                                  | PreFecal (n = 5) | PostOral (n = 5)   | 0.26  | 0.055     |
|                                  | PreOral (n = 3)  | PostFecal (n = 9)  | 0.56  | 0.029     |
|                                  | PreOral (n = 3)  | PreFecal (n = 5)   | 0.86  | 0.033     |

|  |                  |                   |      |       |
|--|------------------|-------------------|------|-------|
|  | PreFecal (n = 5) | PostFecal (n = 9) | 0.32 | 0.029 |
|--|------------------|-------------------|------|-------|

47 **Table S3: Sequence and taxonomy of 178 oral bacterial ASVs identified from healthy**  
48 **human individuals involved in the HMP dataset.**

49

50 See separate Excel table

51 **Table S4: Oral bacterial ASV, taxonomy, and total abundance in human feces of MSKCC**  
52 **allo-HCT recipients. a**, Sequence and taxonomy of 127 oral bacterial ASVs. **b**, Total relative  
53 and absolute abundances of oral and gut bacteria in fecal samples. We determined the oral or gut  
54 bacterial load (absolute abundance) by multiplying the total bacterial load by the respective oral  
55 or gut bacterial fraction (relative abundance). Bacterial load unit is 16S copies per gram of feces.  
56  
57 See separate Excel table

58 **Table S5: Antibiotics associated with intestinal domination by oral bacterial ASVs in**  
59 **MSKCC allo-HCT recipients.** A total of 291 patients with at least 10 samples between day -10  
60 and 40 relative to transplantation were included. The hazard ratios quantify the relative risk of  
61 intestinal domination by any single oral ASV that exceeds 30% in relative abundance compared  
62 to no domination. Oral and intravenous vancomycin were separated because vancomycin does  
63 not reach adequate levels in human gut when given intravenously. Distinct routes of  
64 administration were combined for all other antibiotics. *P* values were corrected for multiple  
65 comparisons using FDR. Significant associations (*P* < 0.05) are highlighted in red. CI:  
66 confidence interval. The statistical test used for data analysis was Cox proportional hazard with  
67 time-dependent covariates.  
68

| Antibiotic                     | Hazard ratio (95% CI)   | <i>P</i> value |
|--------------------------------|-------------------------|----------------|
| macrolide derivatives          | 4.5e-8 (>0)             | 0.996          |
| metronidazole                  | 0.26 (0.04-1.93)        | 0.568          |
| <b>fluoroquinolones</b>        | <b>0.45 (0.26-0.77)</b> | <b>0.022</b>   |
| sulfamethoxazole/trimethoprim  | 0.52 (0.06-4.27)        | 0.720          |
| aztreonam                      | 0.63 (0.15-2.68)        | 0.720          |
| cephalosporins                 | 0.93 (0.50-1.72)        | 0.880          |
| intravenous vancomycin         | 0.94 (0.59-1.49)        | 0.880          |
| carbapenems                    | 1.36 (0.72-2.57)        | 0.580          |
| linezolid                      | 1.57 (0.69-3.58)        | 0.580          |
| <b>oral vancomycin</b>         | <b>1.77 (1.18-2.64)</b> | <b>0.022</b>   |
| <b>piperacillin/tazobactam</b> | <b>2.24 (1.37-3.65)</b> | <b>0.015</b>   |
| aminoglycosides                | 2.95 (0.39-22.18)       | 0.580          |



70 **Table S6. Regression slope between relative abundance of selected bacterial genera and**  
71 **total bacterial load in feces of MSKCC allo-HCT recipients.** Bacterial genera that dominated  
72 at least 100 fecal samples with a relative abundance exceeding 30% were selected for linear  
73 regression analysis in log-log space. In the table, we presented the mean relative abundance of  
74 each genus across HMP samples collected from the gastrointestinal tract, oral cavity, nasal  
75 cavity, skin, and urogenital tract. The five genera with the highest mean relative abundance in the  
76 gastrointestinal tract, compared to the other four body sites, are highlighted in red. Notably, they  
77 all exhibited positive slopes.

78

79 See separate Excel table

80 **Table S7: High-quality genomes of *Streptococcus* species assembled from shotgun**  
81 **metagenomics data.** Metagenome-assembled genomes (MAGs) were constructed from 22 fecal  
82 samples from MSKCC allo-HCT recipients. The iRep value is an index of replication and serves  
83 as an indicator of bacterial replication rate<sup>1</sup>. iRep values that did not meet all genome and  
84 mapping quality requirements are marked as “n/a”. Assembled MAGs containing *Streptococcus*  
85 ASV\_8 are highlighted in red.  
86  
87 See separate Excel table

88 **Table S8: Oral bacterial fraction in feces is associated with survival of MSKCC allo-HCT**  
89 **recipients.** All-cause mortality and GVHD-related mortality were analyzed by a Cox  
90 proportional hazard model and a Fine-Gray subdistribution hazard model, respectively. Both  
91 models were adjusted for *Enterococcus* absolute abundance, age, underlying disease, graft  
92 source, and intensity of conditioning regime. *P* values were FDR-corrected for multiple  
93 comparisons. Abbreviations: CI (confidence interval), AML (Acute Myeloid Leukemia), ALL  
94 (Acute Lymphocytic Leukemia), MDS (Myelodysplastic syndrome), MPN (Myeloproliferative  
95 neoplasm). The statistical test used for data analysis was Cox proportional hazard with time-  
96 dependent covariates.  
97

| Endpoint event         | Covariate                                    | Hazard ratio       | 95% CI    | <i>P</i> value |
|------------------------|----------------------------------------------|--------------------|-----------|----------------|
| All-cause mortality    | Oral bacterial fraction                      | 4.02               | 2.11-7.68 | 6.3e-5         |
|                        | log( <i>Enterococcus</i> absolute abundance) | 1.19               | 1.13-1.25 | 3.5e-11        |
|                        | Age                                          | 1.03               | 1.02-1.04 | 1.0e-12        |
|                        | Disease                                      |                    |           |                |
|                        | AML/ALL/MDS/MPN                              | Reference category |           |                |
|                        | Others                                       | 1.30               | 1.02-1.65 | 0.053          |
|                        | Graft source                                 |                    |           |                |
|                        | T-cell depletion                             | Reference category |           |                |
|                        | Unmodified                                   | 1.21               | 0.92-1.58 | 0.193          |
|                        | Cord                                         | 1.33               | 0.89-1.99 | 0.193          |
|                        | Conditioning intensity                       |                    |           |                |
|                        | Ablative                                     | Reference category |           |                |
|                        | Non-ablative                                 | 0.46               | 0.30-0.72 | 0.001          |
|                        | Reduced intensity                            | 0.90               | 0.67-1.21 | 0.491          |
| GVHD-related mortality | Oral bacterial fraction                      | 4.23               | 1.69-10.6 | 0.006          |
|                        | log( <i>Enterococcus</i> absolute abundance) | 1.22               | 1.13-1.32 | 1.5e-6         |
|                        | Age                                          | 1.03               | 1.01-1.04 | 2.3e-4         |

|  |                        |                    |           |       |
|--|------------------------|--------------------|-----------|-------|
|  | Disease                |                    |           |       |
|  | AML/ALL/MDS/MPN        | Reference category |           |       |
|  | Others                 | 1.31               | 0.90-1.91 | 0.319 |
|  | Graft source           |                    |           |       |
|  | T-cell depletion       | Reference category |           |       |
|  | Unmodified             | 1.07               | 0.67-1.70 | 0.777 |
|  | Cord                   | 1.43               | 0.76-2.70 | 0.420 |
|  | Conditioning intensity |                    |           |       |
|  | Ablative               | Reference category |           |       |
|  | Non-ablative           | 0.90               | 0.47-1.72 | 0.777 |
|  | Reduced intensity      | 1.14               | 0.71-1.84 | 0.777 |

99 **Table S9: Microbiome datasets used in this study.**  
100  
101 See separate Excel table

205 **Supplementary Note 1: Discussion on the discrepancy between our approach and FEAST**  
206 **for estimating oral bacterial fraction**

207 As shown in Extended Data Fig. 2, our approach and FEAST show quantitative  
208 agreement in estimating oral bacterial fractions when the fraction, as estimated by our approach,  
209 exceeds 0.0001. However, for fractions smaller than 0.0001, our approach yields much smaller  
210 estimated values than FEAST. Specifically, in five samples (F\_Day\_7\_DSS\_E,  
211 F\_Day\_3\_Abx\_D, F\_Day\_3\_Control\_E, F\_Day\_7\_Control\_E, F\_Day\_3\_DSS\_E), substantial  
212 differences arise between FEAST and our approach, with the ratio of FEAST to our approach  
213 exceeding 10 (i.e., different magnitudes).

214 This discrepancy can be largely attributed to two reasons. In the case of samples  
215 F\_Day\_7\_DSS\_E and F\_Day\_3\_Abx\_D, where our approach estimated a zero oral bacterial  
216 fraction, the values estimated by FEAST show considerable variability across different runs. In  
217 the case of sample F\_Day\_7\_DSS\_E, FEAST provided a range between  $4.4e-31$  and  $1.2e-3$  for  
218 the minimum and maximum oral bacterial fractions in different runs. Similarly, for sample  
219 F\_Day\_3\_Abx\_D, FEAST estimates span from  $2.5e-255$  to  $6.7e-3$ . Even for samples where the  
220 average FEAST estimation agrees with the oral bacterial fraction estimated by our approach,  
221 notable variations exist from run to run. For example, in the case of sample  
222 F\_Day\_7\_Control\_C, the FEAST-estimated oral bacterial fractions vary between  $7.6e-19$  and  
223  $7.7e-4$ . Another example, F\_Day\_3\_Control\_A, exhibits variations ranging from  $8.5e-7$  to  $9.1e-$   
224 4. Overall, the large variability underscores the inherent difficulty in accurately quantifying oral  
225 bacterial transmission using FEAST when such transmission events are infrequent. For a detailed  
226 table of all FEAST estimates in each individual run, refer to Table S1c.

227 Moreover, FEAST calculates the fraction of oral bacteria in fecal samples on an  
228 individual mouse basis. In contrast, our approach defines oral ASVs using predefined thresholds  
229 for mean relative abundance and prevalence across both oral and fecal samples collected from all  
230 mice (refer to Methods in the main text, Section: Identification of oral ASVs in fecal samples).  
231 Consequently, oral sequences identified by our approach must exhibit a sufficiently high relative  
232 abundance in the oral cavity and a correspondingly low relative abundance in the gut across the  
233 majority of mice. This stringent criterion ensures a more conservative approach, enhancing  
234 confidence that oral ASVs detected in fecal samples genuinely originate from bacteria colonizing  
235 the oral cavity rather than the gut. By incorporating both oral and fecal samples from all mice,  
236 our methodology aims for a robust quantification of transmitted oral bacteria in the gut. Due to  
237 this conservative nature, it is understandable that our approach consistently generated lower  
238 estimated oral bacterial fractions for the five samples compared to those estimated by FEAST.

239 For the two reasons mentioned above, we believe it may not be suitable to compare our  
240 approach against FEAST when fecal samples contain extremely low fraction ( $<0.0001$  in our  
241 method) of oral bacteria.

242 **Supplementary Note 2: Theoretical relationship between oral bacterial fraction and total**  
243 **bacterial load in fecal samples**

244 By definition, the relative and absolute abundance of oral and gut bacteria in a fecal  
245 sample are related through the following equation:

$$246 \quad F_{total} = \frac{F_{oral}}{f_{oral}} = \frac{F_{gut}}{1 - f_{oral}} \quad \text{Eq. S1}$$

247 Here,  $f_{oral}$  represents the relative abundance of oral bacteria,  $F_{oral}$  and  $F_{gut}$  represent the  
248 absolute abundance of oral and gut bacteria respectively, and  $F_{total}(= F_{oral} + F_{gut})$  is the total  
249 bacterial load.

250  
251 Pure Marker hypothesis: When an increase in  $f_{oral}$  is solely driven by gut bacterial depletion,  
252  $F_{oral}$  remains constant (let the constant be  $K_1$ ). In this scenario, Eq. S1 can be rewritten as

$$253 \quad F_{total} = \frac{K_1}{f_{oral}} \quad \text{Eq. S2}$$

254 or on the log-log scale (base  $b$ )

$$255 \quad \log_b F_{total} = \log_b K_1 - \log_b f_{oral} \quad \text{Eq. S3}$$

256 Eq. S3 indicates that the derivative of log-transformed total bacterial load with respect to log-  
257 transformed oral bacterial fraction is -1:

$$258 \quad \frac{d \log_b F_{total}}{d \log_b f_{oral}} = -1 \quad (\text{pure Marker hypothesis}) \quad \text{Eq. S4}$$

259  
260 Pure Expansion hypothesis: When an increase in  $f_{oral}$  is solely driven by absolute expansion of  
261 oral bacterial population,  $F_{gut}$  remains constant (let the constant be  $K_2$ ). In this scenario, Eq. S1  
262 can be rewritten as

$$263 \quad F_{total} = \frac{K_2}{1 - f_{oral}} \quad \text{Eq. S5}$$

264 or on the log-log scale (base  $b$ )

$$265 \quad \log_b F_{total} = \log_b K_2 - \log_b(1 - f_{oral}) \quad \text{Eq. S6}$$

266 From Eq. S6, we found that the derivative of log-transformed total bacterial load with respect to  
267 log-transformed oral bacterial fraction is positive:

$$268 \quad \frac{d \log_b F_{total}}{d \log_b f_{oral}} = \frac{f_{oral}}{1 - f_{oral}} > 0 \quad (\text{pure Expansion hypothesis}) \quad \text{Eq. S7}$$

269

270 **Supplementary Note 3: Validation of oral bacterial ASVs identified from healthy**  
271 **individuals in patients with inflammatory bowel disease**

272 Since human microbiota composition is body site-specific, we hypothesized that the  
273 reference set of 178 oral ASVs identified from a large cohort of healthy individuals recruited by  
274 the Human Microbiome Project (HMP) can be applied to other healthy individuals and patients  
275 for the detection of oral bacteria in their gut. To test this hypothesis, we analyzed a publicly  
276 available dataset from patients with inflammatory bowel disease (IBD) and their healthy  
277 controls<sup>2</sup>. This dataset includes paired fecal and saliva samples from a total of 43 healthy  
278 controls (HC), 16 patients with Crohn's disease (CD), and 42 patients with ulcerative colitis  
279 (UC).

280 By varying three cutoff parameters used to identify oral ASVs from HMP, we showed  
281 that the estimated oral fraction in the fecal samples of the IBD cohort participants is largely  
282 robust against variations in these parameter values (Extended Data Fig. 4a). Among the three  
283 cutoffs, the cutoff for mean relative abundance ( $\theta_a$ , see Methods in the main text for details) has  
284 the strongest impact. Across all healthy individuals, the mean oral bacterial fraction in feces was  
285 found to be 1.2%, which closely aligns with a previously reported estimate of 2%<sup>3</sup>. This fraction  
286 exhibited a nearly three-fold increase to 4.2% and 4.3% in CD and UC patients respectively,  
287 supporting the notion that IBD is associated with an enrichment of oral bacteria in the gut<sup>4</sup>. Most  
288 importantly, more than 84% (mean values: 92.2% for HC, 89.8% for CD, and 84.1% for UC) of  
289 the oral ASVs detected in the fecal samples from the reference set were also found in their  
290 corresponding saliva samples (Extended Data Fig. 4b). In addition, these oral ASVs accounted  
291 for over 87% (mean values: 93.4% for HC, 94.6% for CD, and 87.8% for UC) of the estimated  
292 total relative abundance of oral bacteria in the feces (Extended Data Fig. 4c). In summary, we  
293 validated that the reference set of oral ASVs identified from the HMP dataset can be used to infer  
294 oral ASVs in the fecal samples from other non-HMP healthy individuals and patients even in the  
295 absence of paired oral samples.



296 **Supplementary Note 4: Discussion on associations between biofilm-forming capacity of**  
297 ***Streptococcus*, *Actinomyces* and *Abiotrophia* and their fecal relative abundance in MSKCC**  
298 **allo-HCT recipients**

299 All three bacterial genera have the ability to form biofilm in the oral cavity<sup>5,6</sup>. However, it  
300 remains uncertain if they can form biofilms in the lower gastrointestinal tract. *Streptococcus*  
301 *thermophilus*, the most dominant *Streptococcus* species in the MSKCC allo-HCT cohort (see  
302 Table S7), is a poor biofilm producer due to its inability to firmly attach to surfaces<sup>7</sup>.  
303 Consistently, exopolysaccharides derived from *S. thermophilus* do not interact with mucin<sup>8</sup>,  
304 indicating that this species may be unable to form biofilm in colonic mucus.

305 Furthermore, we used PICRUSt<sup>9</sup> to predict KEGG<sup>10</sup> pathway abundances from 16S  
306 amplicon sequencing data (10,433 samples). The biofilm-forming potential of intestinal  
307 microbiota was quantified by the sum of relative abundance of three KEGG pathways containing  
308 the keyword “biofilm” (ko05111, ko02025, ko02026). We observed a positive, but statistically  
309 insignificant, Spearman correlation between this biofilm index and the relative abundance of oral  
310 *Streptococcus* (Spearman’s rho = 0.004,  $P = 0.661$ ). For oral *Actinomyces* and *Abiotrophia*, the  
311 correlations were statistically significant but negative (Spearman’s rho = -0.075 and -0.056,  $P =$   
312  $9.1e-14$  and  $2.7e-8$ , respectively). Using a subset of 3,108 samples with 16S qPCR data, we  
313 found that the biofilm-forming capacity is positively associated with the total bacterial load  
314 (Spearman’s rho = 0.073,  $P = 6.3e-5$ ). Here, all  $P$  values have been adjusted for multiple  
315 comparisons.

316 Taken together, although we cannot entirely rule out the possibility, both literature studies  
317 and our findings do not provide evidence for a link between intestinal dominations by the three  
318 oral genera and their biofilm-forming capacity.

319 **Supplementary Note 5: Discussion on associations between antibiotic exposure and oral**  
320 **bacterial domination in the fecal samples from MSKCC allo-HCT recipients**

321 During allo-HCT, most patients received multiple antibiotics for prophylactic and  
322 treatment purposes for different periods. Due to different spectra of antibiotics, their  
323 administration led to diverse dynamics of oral bacteria translocated to the intestine, as observed  
324 in fecal samples by 16S rRNA amplicon sequencing (Fig. 4a). To isolate the individual effect of  
325 each antibiotic, we used a time-dependent Cox proportional hazards model (see Methods in the  
326 main text for details). The Cox model revealed that piperacillin-tazobactam, a combination of  $\beta$ -  
327 lactam and  $\beta$ -lactamase inhibitor with a broad spectrum of antibacterial activity, had the most  
328 significant positive influence on intestinal domination by any single oral ASV with a relative  
329 abundance that exceeds 30% (Table S5; Hazard ratio = 2.24; 95% confidence interval, 1.37-3.65;  
330  $P = 0.015$ ). This association aligns with a previous finding showing that piperacillin-tazobactam  
331 caused the most pronounced depletion of anaerobic gut commensals in the same patient cohort<sup>11</sup>.

332 To validate the anaerobe-depleting effect of piperacillin-tazobactam, we reanalyzed a  
333 previous study<sup>12</sup> that investigated the dynamics of gut microbiota during and after total gut  
334 decontamination (using oral piperacillin-tazobactam) and selective gut decontamination (using  
335 oral polymyxin-neomycin) in children undergoing allo-HCT at the Leiden University Medical  
336 Center in the Netherlands. Indeed, the children who received piperacillin-tazobactam exhibited  
337 significantly higher total fraction of oral bacteria in their feces compared to those who received  
338 oral polymyxin-neomycin across all transplantation stages (Extended Data Fig. 5).

339 Our analysis also revealed a significant negative association between fluoroquinolone  
340 antibiotics with oral bacterial domination (Table S5; Hazard ratio = 0.45; 95% confidence  
341 interval, 0.26-0.77;  $P = 0.022$ ). Fluoroquinolones are commonly used as prophylactic agents to  
342 reduce the incidence of gram-negative bacterial infections, including *Pseudomonas* and  
343 *Enterobacteriaceae*, in patients with neutropenia<sup>13</sup>. One possible explanation for this negative  
344 association is that fluoroquinolones are generally more effective against aerobic and facultative  
345 anaerobic bacteria, such as those found in the oral flora, than against anaerobic bacteria<sup>14</sup>.  
346 Another potential explanation is that all allo-HCT recipients were initially prescribed  
347 fluoroquinolone prophylaxis but may be switched to other agents, such as piperacillin-  
348 tazobactam, when fevers or bloodstream infections occur. As a result, fecal samples exposed only  
349 to fluoroquinolones may be enriched for samples collected before acute febrile episodes or from  
350 patients with more benign treatment courses who never got a fever and thus remained on  
351 fluoroquinolone prophylaxis.

352 **Supplementary Note 6: Slow growth of *Streptococcus* ASV\_8 in fecal samples from**  
353 **MSKCC allo-HCT recipients**

354 Among all identified oral ASVs, *Streptococcus* ASV\_8 had the highest mean relative  
355 abundance among all fecal samples of the MSKCC allo-HCT recipients. We previously  
356 published shotgun metagenomics data<sup>15</sup> for 395 fecal samples from these patients. Among the  
357 395 samples, 19 contains at least 10% *Streptococcus* ASV\_8, as indicated by the paired 16S  
358 rRNA sequencing. Using a published bioinformatic pipeline (see Methods in the main text for  
359 details), we obtained 22 high-quality metagenome-assembled genomes (MAGs) of *Streptococcus*  
360 *spp.* from these 19 metagenomic samples. Among the 22 MAGs, four contains ASV\_8, and all  
361 were annotated as *S. thermophilus*. We then calculated the replicate rate of these MAGs through  
362 iRep<sup>1</sup>. The iRep index can accurately estimate the ratio between the coverage at the origin and  
363 terminus of replication, which is proportional to replication rate. We found an averaged iRep  
364 index of 1.35 (Table S7), indicating that, on average, only 35% cells are replicating. This iRep-  
365 based estimation suggests that bacteria containing *Streptococcus* ASV\_8 grew slowly in the  
366 intestine of MSKCC allo-HCT recipients.

- 367 1. Brown, C.T., Olm, M.R., Thomas, B.C. & Banfield, J.F. Measurement of bacterial  
368 replication rates in microbial communities. *Nat. Biotechnol.* **34**, 1256-1263 (2016).
- 369 2. Imai, J., *et al.* A potential pathogenic association between periodontal disease and  
370 Crohn's disease. *JCI Insight* **6**, e148543 (2021).
- 371 3. Schmidt, T.S., *et al.* Extensive transmission of microbes along the gastrointestinal tract.  
372 *Elife* **8**, e42693 (2019).
- 373 4. Read, E., Curtis, M.A. & Neves, J.F. The role of oral bacteria in inflammatory bowel  
374 disease. *Nat. Rev. Gastroenterol. Hepatol.* **18**, 731-742 (2021).
- 375 5. Larsen, T. & Fiehn, N.E. Dental biofilm infections—an update. *APMIS* **125**, 376-384  
376 (2017).
- 377 6. Abdullah, N., *et al.* Intraoral appliances for in situ oral biofilm growth: a systematic  
378 review. *J. Oral Microbiol.* **11**, 1647757 (2019).
- 379 7. Couvigny, B., *et al.* *Streptococcus thermophilus* biofilm formation: a remnant trait of  
380 ancestral commensal life? *PLoS One* **10**, e0128099 (2015).
- 381 8. Arias, S.L. & Brito, I.L. Biophysical determinants of biofilm formation in the gut. *Curr.*  
382 *Opin. Biomed. Eng.* **18**, 100275 (2021).
- 383 9. Douglas, G.M., *et al.* PICRUSt2 for prediction of metagenome functions. *Nat.*  
384 *Biotechnol.* **38**, 685-688 (2020).
- 385 10. Kanehisa, M. & Goto, S. KEGG: Kyoto Encyclopedia of Genes and Genomes. *Nucleic*  
386 *Acids Res.* **28**, 27-30 (2000).
- 387 11. Morjaria, S., *et al.* Antibiotic-induced shifts in fecal microbiota density and composition  
388 during hematopoietic stem cell transplantation. *Infect. Immun.* **87**, e00206-00219 (2019).
- 389 12. Bekker, V., *et al.* Dynamics of the gut microbiota in children receiving selective or total  
390 gut decontamination treatment during hematopoietic stem cell transplantation. *Biol.*  
391 *Blood Marrow Transplant.* **25**, 1164-1171 (2019).
- 392 13. Cometta, A., Calandra, T., Bille, J. & Glauser, M.P. *Escherichia coli* resistant to  
393 fluoroquinolones in patients with cancer and neutropenia. *N. Engl. J. Med.* **330**, 1240-  
394 1241 (1994).
- 395 14. Appelbaum, P.C. Quinolone activity against anaerobes. *Drugs* **58**, 60-64 (1999).
- 396 15. Yan, J., *et al.* A compilation of fecal microbiome shotgun metagenomics from  
397 hematopoietic cell transplantation patients. *Sci. Data* **9**, 1-11 (2022).
- 398 16. Stein-Thoeringer, C., *et al.* Lactose drives *Enterococcus* expansion to promote graft-  
399 versus-host disease. *Science* **366**, 1143-1149 (2019).
