# Supplementary material
Source: PubMed Central journal article supplement (PMC11152985)

Spearman's  $\rho = 0.003$ ,  $P = 0.76$

Oral bacterial fraction

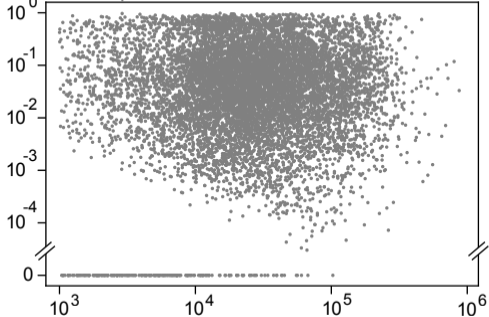

Sequencing depth (# reads)

Supplement: NIHMS1992407-supplement-Supplementary_Figure_1.pdf [file NIHMS1992407-supplement-Supplementary_Figure_1.pdf]

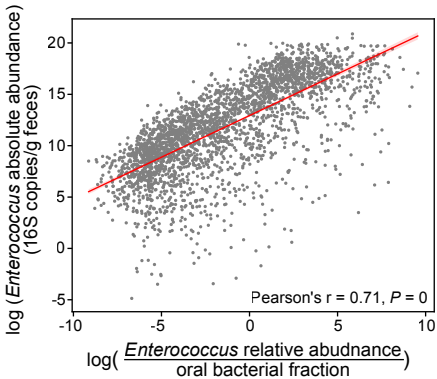

Supplement: NIHMS1992407-supplement-Supplementary_Figure_2.pdf [file NIHMS1992407-supplement-Supplementary_Figure_2.pdf]
